# Supplementary material for: Development of an NGS-Based Workflow for Improved Monitoring of Circulating Plasmids in Support of Risk Assessment of Antimicrobial Resistance Gene Dissemination
Source: PubMed Central journal article supplement (PMC7460218; doi:10.3390/antibiotics9080503), 2020-08-11
Supplement: antibiotics-09-00503-s001.pdf [file antibiotics-09-00503-s001.pdf]

# Development of an NGS-Based Workflow for Improved Monitoring of Circulating Plasmids in Support of Risk Assessment of Antimicrobial Resistance Gene Dissemination

Bas Berbers <sup>1,2</sup>, Pieter-Jan Ceysens <sup>3</sup>, Pierre Bogaerts <sup>4</sup>, Kevin Vanneste <sup>1</sup>, Nancy H.C. Roosens <sup>1</sup>, Kathleen Marchal <sup>2,5,6</sup> and Sigrid C.J. De Keersmaecker <sup>1,\*</sup>

<sup>1</sup> Transversal Activities in Applied Genomics, Sciensano, 1050 Brussels, Belgium; Bas.Berbers@Sciensano.be (B.B.); Kevin.Vanneste@Sciensano.be (K.V.); Nancy.Roosens@Sciensano.be (N.H.C.R.)

<sup>2</sup> Department of Information Technology, IDLab, Ghent University, IMEC, 9000 Ghent, Belgium; Kathleen.Marchal@UGent.be

<sup>3</sup> Bacterial Diseases, Sciensano, 1050 Brussels, Belgium; Pieter-Jan.Ceysens@Sciensano.be (P-J.C.)

<sup>4</sup> National Reference Center for Antimicrobial Resistance in Gram-Negative Bacteria, CHU UCL Namur, 5530 Yvoir, Belgium; Pierre.Bogaerts@uclouvain.be

<sup>5</sup> Department of Plant Biotechnology and Bioinformatics, Ghent University, 9000 Ghent, Belgium; Kathleen.Marchal@UGent.be

<sup>6</sup> Department of Genetics, University of Pretoria, 0002 Pretoria, South Africa; Kathleen.Marchal@UGent.be

\* Correspondence: Sigrid.DeKeersmaecker@Sciensano.be; Tel.: +32-2-6425257

Received: 17 July 2020; Accepted: 7 August 2020; Published: date

**Table S1.** Antimicrobial resistance genes and plasmid replicons detected with ResFinder and PlasmidFinder in whole genome MiSeq, MinION and hybrid assembly of isolate COL20160015 extracted with Genomic Tip 100.

| ResFinder<br>Resistance gene        | MiSeq      |              |                            | MinION     |              |                            | Hybrid     |              |                            |
|-------------------------------------|------------|--------------|----------------------------|------------|--------------|----------------------------|------------|--------------|----------------------------|
|                                     | Conti<br>g | Identit<br>y | Query / Template<br>length | Conti<br>g | Identit<br>y | Query / Template<br>length | Conti<br>g | Identit<br>y | Query / Template<br>length |
| <i>aac(3)-IIa</i> <sup>[1]</sup>    | -          | -            | -                          | <u>4</u>   | <u>99.54</u> | <u>861 / 861</u>           | <u>2</u>   | <u>100</u>   | <u>861 / 861</u>           |
| <i>aac(3)-IId</i> <sup>[1]</sup>    | 69         | 99.37        | 638 / 861                  | <u>6</u>   | <u>99.42</u> | <u>861 / 861</u>           | <u>4</u>   | <u>99.88</u> | <u>861 / 861</u>           |
| <i>aac(3)-IId</i> <sup>[1]</sup>    | 81         | 99.84        | 639 / 861                  | -          | -            | -                          | -          | -            | -                          |
| <i>aac(6')-Ib-cr</i> <sup>[1]</sup> | 95         | 100          | 519 / 519                  | <u>6</u>   | <u>99.42</u> | <u>519 / 519</u>           | <u>4</u>   | <u>100</u>   | <u>519 / 519</u>           |
| <i>aadA1</i> <sup>[1]</sup>         | 72         | 100          | 792 / 792                  | <u>4</u>   | <u>99.75</u> | <u>792 / 792</u>           | <u>2</u>   | <u>100</u>   | <u>792 / 792</u>           |
| <i>aadA2b</i> <sup>[1]</sup>        | 72         | 99.87        | 780 / 780                  | <u>4</u>   | <u>99.23</u> | <u>782 / 780</u>           | <u>2</u>   | <u>99.87</u> | <u>780 / 780</u>           |

|                                 |           |            |                  |          |              |                    |          |              |                    |
|---------------------------------|-----------|------------|------------------|----------|--------------|--------------------|----------|--------------|--------------------|
| <i>aadA5</i> [1]                | 114       | 100        | 789 / 789        | <u>5</u> | <u>99.62</u> | <u>789 / 789</u>   | <u>3</u> | <u>100</u>   | <u>789 / 789</u>   |
| <i>aph(3'')-Ib</i> [1]          | 110       | 100        | 803 / 804        | <u>6</u> | <u>99.75</u> | <u>804 / 804</u>   | <u>4</u> | <u>100</u>   | <u>803 / 804</u>   |
| <i>aph(3'')-Ib</i> [1]          | -         | -          | -                | <u>4</u> | <u>99.88</u> | <u>804 / 804</u>   | <u>2</u> | <u>100</u>   | <u>804 / 804</u>   |
| <i>aph(3')-Ia</i> [1]           | 69        | 99.88      | 816 / 816        | <u>4</u> | <u>99.27</u> | <u>817 / 816</u>   | <u>2</u> | <u>99.88</u> | <u>816 / 816</u>   |
| <i>aph(6)-Id</i> [1]            | 110       | 100        | 837 / 837        | <u>4</u> | <u>99.52</u> | <u>837 / 837</u>   | <u>4</u> | <u>99.88</u> | <u>837 / 837</u>   |
| <i>aph(6)-Id</i> [1]            | -         | -          | -                | <u>6</u> | <u>99.76</u> | <u>837 / 837</u>   | <u>2</u> | <u>100</u>   | <u>837 / 837</u>   |
| <i>bla<sub>KPC-2</sub></i> [2]  | <b>52</b> | <b>100</b> | <b>882 / 882</b> | <u>6</u> | <u>99.77</u> | <u>882 / 882</u>   | <u>4</u> | <u>100</u>   | <u>882 / 882</u>   |
| <i>bla<sub>OXA-1</sub></i> [2]  | 95        | 100        | 831 / 831        | <u>6</u> | <u>99.28</u> | <u>831 / 831</u>   | <u>4</u> | <u>100</u>   | <u>831 / 831</u>   |
| <i>bla<sub>TEM-1A</sub></i> [2] | -         | -          | -                | <u>4</u> | <u>99.88</u> | <u>862 / 861</u>   | <u>2</u> | <u>99.77</u> | <u>861 / 861</u>   |
| <i>bla<sub>TEM-1B</sub></i> [2] | 146       | 100        | 843 / 861        | <u>6</u> | <u>99.88</u> | <u>862 / 861</u>   | <u>4</u> | <u>100</u>   | <u>861 / 861</u>   |
| <i>mcr-1.1</i> [3]              | 10        | 100        | 1626 / 1626      | <u>4</u> | <u>99.88</u> | <u>1626 / 1626</u> | <u>2</u> | <u>100</u>   | <u>1626 / 1626</u> |
| <i>mdf(A)</i> [4]               | 12        | 98.22      | 1233 / 1233      | <u>2</u> | <u>97.81</u> | <u>1233 / 1233</u> | <u>1</u> | <u>98.22</u> | <u>1233 / 1233</u> |
| <i>mph(A)</i> [4]               | 93        | 100        | 906 / 906        | <u>5</u> | <u>99.78</u> | <u>906 / 906</u>   | <u>3</u> | <u>100</u>   | <u>906 / 906</u>   |
| <i>mph(A)</i> [4]               | -         | -          | -                | <u>6</u> | <u>99.89</u> | <u>906 / 906</u>   | <u>4</u> | <u>99.67</u> | <u>922 / 921</u>   |
| <i>catA1</i> [5]                | 147       | 99.85      | 660 / 660        | <u>5</u> | <u>98.94</u> | <u>660 / 660</u>   | <u>3</u> | <u>99.85</u> | <u>660 / 660</u>   |
| <i>catB3</i> [5]                | 95        | 100        | 633 / 633        | <u>6</u> | <u>99.53</u> | <u>635 / 633</u>   | <u>4</u> | <u>100</u>   | <u>633 / 633</u>   |
| <i>cmlA1</i> [5]                | 72        | 99.92      | 1260 / 1260      | <u>4</u> | <u>99.76</u> | <u>1260 / 1260</u> | <u>2</u> | <u>99.92</u> | <u>1260 / 1260</u> |
| <i>aac(6')-Ib-cr</i> [6]        | 95        | 100        | 519 / 519        | <u>6</u> | <u>99.42</u> | <u>519 / 519</u>   | <u>4</u> | <u>100</u>   | <u>519 / 519</u>   |
| <i>qnrB2</i> [6]                | 129       | 100        | 645 / 645        | <u>6</u> | <u>99.22</u> | <u>645 / 645</u>   | <u>4</u> | <u>100</u>   | <u>645 / 645</u>   |
| <i>ARR-3</i> [7]                | 95        | 100        | 453 / 453        | <u>6</u> | <u>100</u>   | <u>453 / 453</u>   | <u>4</u> | <u>100</u>   | <u>453 / 453</u>   |
| <i>sul1</i> [8]                 | 134       | 100        | 840 / 840        | <u>6</u> | <u>99.64</u> | <u>840 / 840</u>   | <u>4</u> | <u>99.88</u> | <u>840 / 840</u>   |
| <i>sul1</i> [8]                 | -         | -          | -                | <u>5</u> | <u>99.76</u> | <u>840 / 840</u>   | <u>3</u> | <u>100</u>   | <u>840 / 840</u>   |
| <i>sul1</i> [8]                 | -         | -          | -                | <u>6</u> | <u>99.76</u> | <u>840 / 840</u>   | -        | -            | -                  |
| <i>sul3</i> [8]                 | 72        | 100        | 792 / 792        | <u>4</u> | <u>99.5</u>  | <u>794 / 792</u>   | <u>2</u> | <u>100</u>   | <u>792 / 792</u>   |

|                               |                    |                      |                                    |                    |                      |                                    |                    |                      |                                    |
|-------------------------------|--------------------|----------------------|------------------------------------|--------------------|----------------------|------------------------------------|--------------------|----------------------|------------------------------------|
| <i>tet(A)</i> <sup>[9]</sup>  | 32                 | 100                  | 1200 / 1200                        | <u>4</u>           | <u>99.67</u>         | <u>1200 / 1200</u>                 | <u>2</u>           | <u>100</u>           | <u>1200 / 1200</u>                 |
| <i>dfrA17</i> <sup>[10]</sup> | 114                | 100                  | 474 / 474                          | <u>5</u>           | <u>99.16</u>         | <u>474 / 474</u>                   | <u>3</u>           | <u>100</u>           | <u>474 / 474</u>                   |
| <i>dfrA19</i> <sup>[10]</sup> | 91                 | 100                  | 570 / 570                          | <u>6</u>           | <u>99.82</u>         | <u>570 / 570</u>                   | <u>4</u>           | <u>100</u>           | <u>570 / 570</u>                   |
| <b>PlasmidFinder</b>          | <b>MiSeq</b>       |                      |                                    | <b>MinION</b>      |                      |                                    | <b>Hybrid</b>      |                      |                                    |
| <b>Replicon</b>               | <b>Conti<br/>g</b> | <b>Identit<br/>y</b> | <b>Query / Template<br/>length</b> | <b>Conti<br/>g</b> | <b>Identit<br/>y</b> | <b>Query / Template<br/>length</b> | <b>Conti<br/>g</b> | <b>Identit<br/>y</b> | <b>Query / Template<br/>length</b> |
| Col156                        | 89                 | 98.03                | 152 / 154                          | -                  | -                    | -                                  | 8                  | 98.03                | 152 / 154                          |
| IncFIB(AP001918)              | 50                 | 98.97                | 682 / 682                          | 5                  | 98.09                | 682 / 682                          | 3                  | 99.17                | 603 / 682                          |
| IncFII                        | 57                 | 100                  | 261 / 261                          | 5                  | 100                  | 261 / 261                          | 3                  | 100                  | 261 / 261                          |
| IncHI2                        | 10                 | 100                  | 327 / 327                          | 4                  | 99.39                | 327 / 327                          | 2                  | 100                  | 327 / 327                          |
| IncHI2A                       | 10                 | 99.52                | 630 / 630                          | 4                  | 99.05                | 630 / 630                          | 2                  | 99.52                | 630 / 630                          |
| IncN                          | 52                 | 99.42                | 514 / 514                          | 6                  | 99.03                | 514 / 514                          | 4                  | 99.42                | 514 / 514                          |

In bold underlined are the AMR genes of which it is certain that they are located on a plasmid.

[1] Aminoglycoside, [2] Beta-lactam, [3] Colistin, [4] Macrolide, [5] Phenicol, [6] Quinolone, [7] Rifampicin, [8] Sulphonamide, [9] Tetracycline, [10] Trimethoprim

**Table S2.** Antimicrobial resistance genes and plasmid replicons detected with ResFinder and PlasmidFinder in whole genome MiSeq, MinION and hybrid assembly of isolate R274 extracted with Genomic Tip 100.

| <b>ResFinder</b>                  | <b>MiSeq</b>       |                      |                                    | <b>MinION</b>      |                      |                                    | <b>Hybrid</b>      |                      |                                    |
|-----------------------------------|--------------------|----------------------|------------------------------------|--------------------|----------------------|------------------------------------|--------------------|----------------------|------------------------------------|
| <b>Resistance gene</b>            | <b>Conti<br/>g</b> | <b>Identit<br/>y</b> | <b>Query / Template<br/>length</b> | <b>Conti<br/>g</b> | <b>Identit<br/>y</b> | <b>Query / Template<br/>length</b> | <b>Conti<br/>g</b> | <b>Identit<br/>y</b> | <b>Query / Template<br/>length</b> |
| <i>aac(3)-IIa</i> <sup>[1]</sup>  | 20                 | 100                  | 861 / 861                          | <u>2</u>           | <u>99.3</u>          | <u>862 / 861</u>                   | <u>2</u>           | <u>100</u>           | <u>861 / 861</u>                   |
| <i>aadA1</i> <sup>[1]</sup>       | 20                 | 100                  | 792 / 792                          | <u>2</u>           | <u>99.62</u>         | <u>792 / 792</u>                   | <u>2</u>           | <u>100</u>           | <u>792 / 792</u>                   |
| <i>aadA2b</i> <sup>[1]</sup>      | 20                 | 99.87                | 780 / 780                          | <u>2</u>           | <u>99.87</u>         | <u>780 / 780</u>                   | <u>2</u>           | <u>99.87</u>         | <u>780 / 780</u>                   |
| <i>aph(3'')-Ib</i> <sup>[1]</sup> | 20                 | 100                  | 804 / 804                          | <u>2</u>           | <u>99.88</u>         | <u>804 / 804</u>                   | <u>2</u>           | <u>100</u>           | <u>804 / 804</u>                   |
| <i>aph(3')-Ia</i> <sup>[1]</sup>  | 20                 | 99.88                | 816 / 816                          | <u>2</u>           | <u>99.02</u>         | <u>817 / 816</u>                   | <u>2</u>           | <u>99.88</u>         | <u>816 / 816</u>                   |
| <i>aph(6)-Id</i> <sup>[1]</sup>   | 20                 | 100                  | 837 / 837                          | <u>2</u>           | <u>99.76</u>         | <u>837 / 837</u>                   | <u>2</u>           | <u>100</u>           | <u>837 / 837</u>                   |

|                                  |                    |                      |                                    |                    |                      |                                    |                    |                      |                                    |
|----------------------------------|--------------------|----------------------|------------------------------------|--------------------|----------------------|------------------------------------|--------------------|----------------------|------------------------------------|
| <i>bla</i> <sub>TEM-1A</sub> [2] | 20                 | 100                  | 861 / 861                          | <u>2</u>           | <u>99.88</u>         | <u>861 / 861</u>                   | <u>2</u>           | <u>100</u>           | <u>861 / 861</u>                   |
| <i>mcr-1.1</i> [3]               | 78                 | 100                  | 1626 / 1626                        | <u>2</u>           | <u>99.69</u>         | <u>1629 / 1626</u>                 | <u>2</u>           | <u>100</u>           | <u>1626 / 1626</u>                 |
| <i>mdf(A)</i> [4]                | 2                  | 99.92                | 1233 / 1233                        | 1                  | 99.59                | 1233 / 1233                        | 1                  | 99.92                | 1233 / 1233                        |
| <i>cmlA1</i> [5]                 | 20                 | 99.92                | 1260 / 1260                        | <u>2</u>           | <u>99.68</u>         | <u>1261 / 1260</u>                 | <u>2</u>           | <u>99.92</u>         | <u>1260 / 1260</u>                 |
| <i>sul3</i> [6]                  | 20                 | 100                  | 792 / 792                          | <u>2</u>           | <u>99.75</u>         | <u>792 / 792</u>                   | <u>2</u>           | <u>100</u>           | <u>792 / 792</u>                   |
| <i>tet(A)</i> [7]                | 20                 | 100                  | 1200 / 1200                        | <u>2</u>           | <u>99.58</u>         | <u>1200 / 1200</u>                 | <u>2</u>           | <u>100</u>           | <u>1200 / 1200</u>                 |
| <b>PlasmidFinder</b>             | <b>MiSeq</b>       |                      |                                    | <b>MinION</b>      |                      |                                    | <b>Hybrid</b>      |                      |                                    |
| <b>Replicon</b>                  | <b>Conti<br/>g</b> | <b>Identit<br/>y</b> | <b>Query / Template<br/>length</b> | <b>Conti<br/>g</b> | <b>Identit<br/>y</b> | <b>Query / Template<br/>length</b> | <b>Conti<br/>g</b> | <b>Identit<br/>y</b> | <b>Query / Template<br/>length</b> |
| IncHI2                           | 42                 | 100                  | 327 / 327                          | 2                  | 100                  | 327 / 327                          | 2                  | 100                  | 327 / 327                          |
| IncHI2A                          | 25                 | 99.52                | 630 / 630                          | 2                  | 99.21                | 630 / 630                          | 2                  | 99.52                | 630 / 630                          |

In bold underlined are the AMR genes of which it is certain that they are located on a plasmid.

[1] Aminoglycoside, [2] Beta-lactam, [3] Colistin, [4] Macrolide, [5] Phenicol, [6] Sulphonamide, [7] Tetracycline

**Table S3.** Antimicrobial resistance genes and plasmid replicons detected with ResFinder and PlasmidFinder in whole genome MiSeq, MinION and hybrid assembly of the conjugated isolate R274 extracted with Genomic Tip 100 with all chromosomal reads (mapped to CP000948.1) filtered out prior to assembly.

| <b>ResFinder</b>       | <b>MiSeq</b>       |                      |                                    | <b>MinION</b>      |                      |                                    | <b>Hybrid</b>      |                      |                                    |
|------------------------|--------------------|----------------------|------------------------------------|--------------------|----------------------|------------------------------------|--------------------|----------------------|------------------------------------|
| <b>Resistance gene</b> | <b>Conti<br/>g</b> | <b>Identit<br/>y</b> | <b>Query / Template<br/>length</b> | <b>Conti<br/>g</b> | <b>Identit<br/>y</b> | <b>Query / Template<br/>length</b> | <b>Conti<br/>g</b> | <b>Identit<br/>y</b> | <b>Query / Template<br/>length</b> |
| <i>aac(3)-IIa</i> [1]  | 2                  | 100                  | 861 / 861                          | 1                  | 99.19                | 864 / 861                          | 1                  | 100                  | 861 / 861                          |
| <i>aadA1</i> [1]       | 2                  | 100                  | 792 / 792                          | 1                  | 99.87                | 792 / 792                          | 1                  | 100                  | 792 / 792                          |
| <i>aadA2b</i> [1]      | 2                  | 99.87                | 780 / 780                          | 1                  | 99.74                | 781 / 780                          | 1                  | 99.87                | 780 / 780                          |
| <i>aph(3'')-Ib</i> [1] | 2                  | 100                  | 804 / 804                          | 1                  | 99.88                | 804 / 804                          | 1                  | 100                  | 804 / 804                          |
| <i>aph(3')-Ia</i> [1]  | 2                  | 99.88                | 816 / 816                          | 1                  | 99.26                | 816 / 816                          | 1                  | 99.88                | 816 / 816                          |
| <i>aph(6)-Id</i> [1]   | 2                  | 100                  | 837 / 837                          | 1                  | 99.64                | 838 / 837                          | 1                  | 100                  | 837 / 837                          |

|                                  |               |                 |                                |               |                 |                                |               |                 |                                |
|----------------------------------|---------------|-----------------|--------------------------------|---------------|-----------------|--------------------------------|---------------|-----------------|--------------------------------|
| <i>bla</i> <sub>TEM-1A</sub> [2] | 2             | 100             | 861 / 861                      | 1             | 98.46           | 779 / 861                      | 1             | 100             | 861 / 861                      |
| <i>mcr-1.1</i> [3]               | 4             | 100             | 1626 / 1626                    | 1             | 99.57           | 1631 / 1626                    | 1             | 100             | 1626 / 1626                    |
| <i>cmlA1</i> [4]                 | 2             | 99.92           | 1260 / 1260                    | 1             | 99.6            | 1260 / 1260                    | 1             | 99.92           | 1260 / 1260                    |
| <i>sul3</i> [5]                  | 2             | 100             | 792 / 792                      | 1             | 99.75           | 792 / 792                      | 1             | 100             | 792 / 792                      |
| <i>tet(A)</i> [6]                | 2             | 100             | 1200 / 1200                    | 1             | 99.5            | 1201 / 1200                    | 1             | 100             | 1200 / 1200                    |
| <b>PlasmidFinder</b>             | <b>MiSeq</b>  |                 |                                | <b>MinION</b> |                 |                                | <b>Hybrid</b> |                 |                                |
| <b>Plasmid replicon</b>          | <b>contig</b> | <b>Identity</b> | <b>Query / Template length</b> | <b>Contig</b> | <b>Identity</b> | <b>Query / Template length</b> | <b>Contig</b> | <b>Identity</b> | <b>Query / Template length</b> |
| IncHI2                           | 1             | 100             | 327 / 327                      | 1             | 100             | 327 / 327                      | 1             | 100             | 327 / 327                      |
| IncHI2A                          | 1             | 99.52           | 630 / 630                      | 1             | 99.21           | 630 / 630                      | 1             | 99.52           | 630 / 630                      |

[1] Aminoglycoside, [2] Beta-lactam, [3] Colistin, [4] Phenicol, [5] Sulphonamide, [6] Tetracycline

**Table S4.** Quality parameters of the extracted DNA of isolate S15BD05371 used for sequencing

| Extraction method     | content extracted | Purity  |         | Conc.             | DIN               | fragment size     | qPCR   |                 |                | MinION            |
|-----------------------|-------------------|---------|---------|-------------------|-------------------|-------------------|--------|-----------------|----------------|-------------------|
|                       |                   | 260/280 | 260/230 | ng/ $\mu$ l       | score             | bp                | 16S Cq | <i>mcr-1</i> Cq | Cq difference* | average read size |
| G100 (extr-3)         | whole genome      | 1.81    | 1.685   | 482.5             | 9.4               | >60000            | 16.35  | 19.27           | -2.92          | 7121              |
| MagCore (extr-4)      | whole genome      | 1.81    | 1.58    | 70.8              | 6.5               | 10758             | 14.63  | 17.05           | -2.42          | 877               |
| G500 (extr-5)         | plasmid           | 1.76    | 1.21    | 263               | 9.1               | >60000            | 14.13  | 16.37           | -2.24          | 4946              |
| G500-exo (extr-6)     | plasmid           | 5.78    | 0.48    | OOOR <sup>1</sup> | OOOR <sup>2</sup> | OOOR <sup>1</sup> | 18.84  | 20.96           | -2.12          | OOOR <sup>1</sup> |
| phenol (extr-7)       | plasmid           | 1.86    | 1.13    | 9                 | OOOR <sup>2</sup> | >60000            | 20.23  | 17.19           | 3.04           | 842               |
| phenol-ampli (extr-8) | plasmid           | 1.82    | 1.73    | 7.765             | OOOR <sup>2</sup> | 31196             | 18.2   | 16.46           | 1.74           | 641               |

Each DNA extraction was performed multiple times, but only the quality values of the extracts that were sequenced are shown here. These quality values are representative to that of the replicates.\*A positive Cq difference corresponds to a higher proportion of plasmid DNA than chromosomal DNA in the DNA extraction, and vice versa for a negative Cq difference.<sup>1</sup> DNA concentration was too low in G500-exo and excluded from further analyses. <sup>2</sup> the DNA concentration was too low to determine the DNA integrity (DIN).OOOR = out of range.

**Table S5.** The most similar sequences from the NCBI nt database to the incomplete contigs in the hybrid assemblies.

| DNA extraction | contig | top hit in NCBI nt database | description                                                                                                                      |
|----------------|--------|-----------------------------|----------------------------------------------------------------------------------------------------------------------------------|
| G500 (as-13)   | 3      | CP051269.1                  | <i>Salmonella enterica</i> subsp. <i>enterica</i> serovar Typhimurium strain OLF_FSR1_WB_Finch_ST-13 chromosome, complete genome |
| G500 (as-13)   | 4      | CP051269.1                  | <i>Salmonella enterica</i> subsp. <i>enterica</i> serovar Typhimurium strain OLF_FSR1_WB_Finch_ST-13 chromosome, complete genome |
| G500 (as-13)   | 5      | CP051269.1                  | <i>Salmonella enterica</i> subsp. <i>enterica</i> serovar Typhimurium strain OLF_FSR1_WB_Finch_ST-13 chromosome, complete genome |
| Phenol (as-14) | 1      | AP019374.1                  | <i>Salmonella enterica</i> subsp. <i>enterica</i> serovar 4,[5],12:i:- L-3838 DNA, complete genome                               |
| Phenol (as-14) | 2      | CP011428.1                  | <i>Salmonella enterica</i> subsp. <i>enterica</i> strain YU39, complete genome                                                   |
| Phenol (as-14) | 3      | CP003836.1                  | <i>Salmonella enterica</i> subsp. <i>enterica</i> serovar Typhimurium str. U288, complete genome                                 |
| Phenol (as-14) | 4      | LN999997.1                  | <i>Salmonella enterica</i> subsp. <i>enterica</i> serovar Typhimurium isolate SO4698-09 genome assembly, chromosome: I           |
| Phenol (as-14) | 6      | LN999997.1                  | <i>Salmonella enterica</i> subsp. <i>enterica</i> serovar Typhimurium isolate SO4698-09 genome assembly, chromosome: I           |
| Phenol (as-14) | 7      | AP019375.1                  | <i>Salmonella enterica</i> subsp. <i>enterica</i> serovar 4,[5],12:i:- L-3841 DNA, complete genome                               |
| Phenol (as-14) | 8      | AP019375.1                  | <i>Salmonella enterica</i> subsp. <i>enterica</i> serovar 4,[5],12:i:- L-3841 DNA, complete genome                               |
| Phenol (as-14) | 9      | CP019649.1                  | <i>Salmonella enterica</i> subsp. <i>enterica</i> serovar Typhimurium strain TW-Stm6 chromosome, complete genome                 |
| Phenol (as-14) | 10     | AP019374.1                  | <i>Salmonella enterica</i> subsp. <i>enterica</i> serovar 4,[5],12:i:- L-3838 DNA, complete genome                               |
| Phenol (as-14) | 11     | CP033257.1                  | <i>Salmonella enterica</i> subsp. <i>enterica</i> strain CFSA12 chromosome, complete genome                                      |
| Phenol (as-14) | 12     | AP019374.1                  | <i>Salmonella enterica</i> subsp. <i>enterica</i> serovar 4,[5],12:i:- L-3838 DNA, complete genome                               |
| Phenol (as-14) | 13     | AP014565.1                  | <i>Salmonella enterica</i> subsp. <i>enterica</i> serovar Typhimurium str. L-3553 DNA, complete genome                           |
| Phenol (as-14) | 14     | CP029568.1                  | <i>Salmonella enterica</i> strain DA34837 chromosome, complete genome                                                            |
| Phenol (as-14) | 15     | LN999997.1                  | <i>Salmonella enterica</i> subsp. <i>enterica</i> serovar Typhimurium isolate SO4698-09 genome assembly, chromosome: I           |
| Phenol (as-14) | 16     | CP012681.1                  | <i>Salmonella enterica</i> subsp. <i>enterica</i> serovar Typhimurium strain 33676, complete genome                              |
| Phenol (as-14) | 17     | AP019374.1                  | <i>Salmonella enterica</i> subsp. <i>enterica</i> serovar 4,[5],12:i:- L-3838 DNA, complete genome                               |
| Phenol (as-14) | 18     | CP011428.1                  | <i>Salmonella enterica</i> subsp. <i>enterica</i> strain YU39, complete genome                                                   |

|                |    |            |                                                                                                        |
|----------------|----|------------|--------------------------------------------------------------------------------------------------------|
| Phenol (as-14) | 19 | AP019375.1 | <i>Salmonella enterica</i> subsp. <i>enterica</i> serovar 4,[5],12:i:- L-3841 DNA, complete genome     |
| Phenol (as-14) | 20 | AP019375.1 | <i>Salmonella enterica</i> subsp. <i>enterica</i> serovar 4,[5],12:i:- L-3841 DNA, complete genome     |
| Phenol (as-14) | 21 | AP019375.1 | <i>Salmonella enterica</i> subsp. <i>enterica</i> serovar 4,[5],12:i:- L-3841 DNA, complete genome     |
| Phenol (as-14) | 22 | AP019374.1 | <i>Salmonella enterica</i> subsp. <i>enterica</i> serovar 4,[5],12:i:- L-3838 DNA, complete genome     |
| Phenol (as-14) | 23 | AP014565.1 | <i>Salmonella enterica</i> subsp. <i>enterica</i> serovar Typhimurium str. L-3553 DNA, complete genome |
| Phenol (as-14) | 24 | CP033255.1 | <i>Salmonella enterica</i> subsp. <i>enterica</i> strain CFSA244 chromosome, complete genome           |
| Phenol (as-14) | 25 | AP019375.1 | <i>Salmonella enterica</i> subsp. <i>enterica</i> serovar 4,[5],12:i:- L-3841 DNA, complete genome     |
| Phenol (as-14) | 26 | CP033257.1 | <i>Salmonella enterica</i> subsp. <i>enterica</i> strain CFSA12 chromosome, complete genome            |
| Phenol (as-14) | 27 | AP019375.1 | <i>Salmonella enterica</i> subsp. <i>enterica</i> serovar 4,[5],12:i:- L-3841 DNA, complete genome     |
| Phenol (as-14) | 28 | CP029567.1 | <i>Salmonella enterica</i> strain DA34821 chromosome, complete genome                                  |
| Phenol (as-14) | 29 | CP029568.1 | <i>Salmonella enterica</i> strain DA34837 chromosome, complete genome                                  |
| Phenol (as-14) | 30 | AP019375.1 | <i>Salmonella enterica</i> subsp. <i>enterica</i> serovar 4,[5],12:i:- L-3841 DNA, complete genome     |
| Phenol (as-14) | 31 | AP019375.1 | <i>Salmonella enterica</i> subsp. <i>enterica</i> serovar 4,[5],12:i:- L-3841 DNA, complete genome     |
| Phenol (as-14) | 32 | AP019375.1 | <i>Salmonella enterica</i> subsp. <i>enterica</i> serovar 4,[5],12:i:- L-3841 DNA, complete genome     |
| Phenol (as-14) | 33 | AP019375.1 | <i>Salmonella enterica</i> subsp. <i>enterica</i> serovar 4,[5],12:i:- L-3841 DNA, complete genome     |
| Phenol (as-14) | 34 | AP019375.1 | <i>Salmonella enterica</i> subsp. <i>enterica</i> serovar 4,[5],12:i:- L-3841 DNA, complete genome     |
| Phenol (as-14) | 35 | AP019375.1 | <i>Salmonella enterica</i> subsp. <i>enterica</i> serovar 4,[5],12:i:- L-3841 DNA, complete genome     |
| Phenol (as-14) | 36 | AP019375.1 | <i>Salmonella enterica</i> subsp. <i>enterica</i> serovar 4,[5],12:i:- L-3841 DNA, complete genome     |
| Phenol (as-14) | 37 | AP019375.1 | <i>Salmonella enterica</i> subsp. <i>enterica</i> serovar 4,[5],12:i:- L-3841 DNA, complete genome     |
| Phenol (as-14) | 38 | AP019375.1 | <i>Salmonella enterica</i> subsp. <i>enterica</i> serovar 4,[5],12:i:- L-3841 DNA, complete genome     |
| Phenol (as-14) | 39 | AP019375.1 | <i>Salmonella enterica</i> subsp. <i>enterica</i> serovar 4,[5],12:i:- L-3841 DNA, complete genome     |
| Phenol (as-14) | 40 | AP019375.1 | <i>Salmonella enterica</i> subsp. <i>enterica</i> serovar 4,[5],12:i:- L-3841 DNA, complete genome     |
| Phenol (as-14) | 41 | AP019375.1 | <i>Salmonella enterica</i> subsp. <i>enterica</i> serovar 4,[5],12:i:- L-3841 DNA, complete genome     |
| Phenol (as-14) | 42 | AP019375.1 | <i>Salmonella enterica</i> subsp. <i>enterica</i> serovar 4,[5],12:i:- L-3841 DNA, complete genome     |
| Phenol (as-14) | 43 | AP019375.1 | <i>Salmonella enterica</i> subsp. <i>enterica</i> serovar 4,[5],12:i:- L-3841 DNA, complete genome     |
| Phenol (as-14) | 44 | AP019375.1 | <i>Salmonella enterica</i> subsp. <i>enterica</i> serovar 4,[5],12:i:- L-3841 DNA, complete genome     |

|                |    |            |                                                                                                    |
|----------------|----|------------|----------------------------------------------------------------------------------------------------|
| Phenol (as-14) | 45 | AP019375.1 | <i>Salmonella enterica</i> subsp. <i>enterica</i> serovar 4,[5],12:i:- L-3841 DNA, complete genome |
| Phenol (as-14) | 46 | AP019375.1 | <i>Salmonella enterica</i> subsp. <i>enterica</i> serovar 4,[5],12:i:- L-3841 DNA, complete genome |
| Phenol (as-14) | 47 | AP019374.1 | <i>Salmonella enterica</i> subsp. <i>enterica</i> serovar 4,[5],12:i:- L-3838 DNA, complete genome |
| Phenol (as-14) | 48 | AP019375.1 | <i>Salmonella enterica</i> subsp. <i>enterica</i> serovar 4,[5],12:i:- L-3841 DNA, complete genome |
| Phenol (as-14) | 49 | AP019375.1 | <i>Salmonella enterica</i> subsp. <i>enterica</i> serovar 4,[5],12:i:- L-3841 DNA, complete genome |
| Phenol (as-14) | 50 | AP019375.1 | <i>Salmonella enterica</i> subsp. <i>enterica</i> serovar 4,[5],12:i:- L-3841 DNA, complete genome |
| Phenol (as-14) | 51 | AP019375.1 | <i>Salmonella enterica</i> subsp. <i>enterica</i> serovar 4,[5],12:i:- L-3841 DNA, complete genome |
| Phenol (as-14) | 52 | CP006717.1 | <i>Salmonella enterica</i> subsp. <i>enterica</i> serovar Thompson str. RM6836, complete genome    |
| Phenol (as-14) | 53 | AP019375.1 | <i>Salmonella enterica</i> subsp. <i>enterica</i> serovar 4,[5],12:i:- L-3841 DNA, complete genome |
| Phenol (as-14) | 54 | AP019375.1 | <i>Salmonella enterica</i> subsp. <i>enterica</i> serovar 4,[5],12:i:- L-3841 DNA, complete genome |
| Phenol (as-14) | 55 | HG326213.1 | <i>Salmonella enterica</i> subsp. <i>enterica</i> serovar Typhimurium str. DT2, complete genome    |
| Phenol (as-14) | 56 | AP019375.1 | <i>Salmonella enterica</i> subsp. <i>enterica</i> serovar 4,[5],12:i:- L-3841 DNA, complete genome |
| Phenol (as-14) | 57 | CP020101.1 | <i>Salmonella enterica</i> strain UFPRLABMOR1 chromosome, complete genome                          |
| Phenol (as-14) | 58 | AP019375.1 | <i>Salmonella enterica</i> subsp. <i>enterica</i> serovar 4,[5],12:i:- L-3841 DNA, complete genome |
| Phenol (as-14) | 59 | AP019375.1 | <i>Salmonella enterica</i> subsp. <i>enterica</i> serovar 4,[5],12:i:- L-3841 DNA, complete genome |
| Phenol (as-14) | 60 | CP024170.1 | <i>Microbacterium</i> sp. Y-01 chromosome, complete genome                                         |
| Phenol (as-14) | 61 | AP019375.1 | <i>Salmonella enterica</i> subsp. <i>enterica</i> serovar 4,[5],12:i:- L-3841 DNA, complete genome |
| Phenol (as-14) | 62 | AP019375.1 | <i>Salmonella enterica</i> subsp. <i>enterica</i> serovar 4,[5],12:i:- L-3841 DNA, complete genome |



**Table S6.** Antimicrobial resistance genes detected with ResFinder in whole genome MiSeq, MinION and hybrid assembly of isolate S15BD05371 extracted with MagCore.

| Resistance gene                             | MiSeq  |          |                         | MinION |          |                         | Hybrid |          |                         |
|---------------------------------------------|--------|----------|-------------------------|--------|----------|-------------------------|--------|----------|-------------------------|
|                                             | Contig | Identity | Query / Template length | Contig | Identity | Query / Template length | Contig | Identity | Query / Template length |
| <i>aac(3)-IV</i> <sup>[1]</sup>             | 9      | 100      | 777 / 777               | 2      | 99.61    | 779 / 777               | 2      | 100      | 777 / 777               |
| <i>aac(6')-Iaa</i> <sup>[1]</sup>           | 1      | 100      | 438 / 438               | 1      | 100      | 438 / 438               | 1      | 100      | 438 / 438               |
| <i>aadA2b</i> <sup>[1]</sup>                | 38     | 99.87    | 780 / 780               | 2      | 99.62    | 780 / 780               | 2      | 99.87    | 780 / 780               |
| <i>aph(4)-Ia</i> <sup>[1]</sup>             | 9      | 100      | 1026 / 1026             | 2      | 100      | 1026 / 1026             | 2      | 100      | 1026 / 1026             |
| <i>bla</i> <sub>TEM-1B</sub> <sup>[2]</sup> | 9      | 100      | 861 / 861               | 2      | 99.54    | 862 / 861               | 2      | 100      | 861 / 861               |
| <i>mcr-1.1</i> <sup>[3]</sup>               | 9      | 100      | 1626 / 1626             | 2      | 99.82    | 1627 / 1626             | 2      | 100      | 1626 / 1626             |
| <i>lnu(F)</i> <sup>[4]</sup>                | 38     | 100      | 761 / 822               | 2      | 99.61    | 761 / 822               | 2      | 100      | 761 / 822               |
| <i>qnrS1</i> <sup>[5]</sup>                 | 51     | 100      | 657 / 657               | 2      | 100      | 657 / 657               | 2      | 100      | 657 / 657               |
| <i>sul3</i> <sup>[6]</sup>                  | 40     | 100      | 792 / 792               | 2      | 99.87    | 792 / 792               | 2      | 100      | 792 / 792               |
| <i>tet(A)</i> <sup>[7]</sup>                | 9      | 100      | 1200 / 1200             | 2      | 99.67    | 1200 / 1200             | 2      | 100      | 1200 / 1200             |
| <i>tet(B)</i> <sup>[7]</sup>                | 31     | 100      | 1206 / 1206             | 1      | 99.92    | 1206 / 1206             | 1      | 100      | 1206 / 1206             |
| <i>dfrA12</i> <sup>[8]</sup>                | 38     | 100      | 498 / 498               | 2      | 99.6     | 498 / 498               | 2      | 100      | 498 / 498               |

<sup>[1]</sup> Aminoglycoside, <sup>[2]</sup> Beta-lactam, <sup>[3]</sup> Colistin, <sup>[4]</sup> Macrolide, <sup>[5]</sup> Quinolone, <sup>[6]</sup> Sulphonamide, <sup>[7]</sup> Tetracycline, <sup>[8]</sup> Trimethoprim.

**Table S7.** Antimicrobial resistance genes detected with ResFinder in MiSeq, MinION and hybrid assembly of isolate S15BD05371 extracted with Genomic Tip500 with plasmid extraction buffers.

| Resistance gene                   | MiSeq  |          |                         | MinION |          |                         | Hybrid |          |                         |
|-----------------------------------|--------|----------|-------------------------|--------|----------|-------------------------|--------|----------|-------------------------|
|                                   | Contig | Identity | Query / Template length | Contig | Identity | Query / Template length | Contig | Identity | Query / Template length |
| <i>aac(3)-IV</i> <sup>[1]</sup>   | 1      | 100      | 777 / 777               | 3      | 99.87    | 777 / 777               | 2      | 100      | 777 / 777               |
| <i>aac(6')-Iaa</i> <sup>[1]</sup> | 2      | 100      | 438 / 438               | 2      | 100      | 438 / 438               | 1      | 100      | 438 / 438               |
| <i>aadA2b</i> <sup>[1]</sup>      | 290    | 99.87    | 780 / 780               | 3      | 99.74    | 780 / 780               | 2      | 99.87    | 780 / 780               |

|                                             |     |     |             |   |       |             |   |     |             |
|---------------------------------------------|-----|-----|-------------|---|-------|-------------|---|-----|-------------|
| <i>aph(4)-Ia</i> <sup>[1]</sup>             | 1   | 100 | 1026 / 1026 | 3 | 100   | 1026 / 1026 | 2 | 100 | 1026 / 1026 |
| <i>bla</i> <sub>TEM-1B</sub> <sup>[2]</sup> | 1   | 100 | 861 / 861   | 3 | 100   | 861 / 861   | 2 | 100 | 861 / 861   |
| <i>mcr-1.1</i> <sup>[3]</sup>               | 1   | 100 | 1626 / 1626 | 3 | 99.94 | 1626 / 1626 | 2 | 100 | 1626 / 1626 |
| <i>lnu(F)</i> <sup>[4]</sup>                | 290 | 100 | 761 / 822   | 3 | 99.61 | 762 / 822   | 2 | 100 | 761 / 822   |
| <i>qnrS1</i> <sup>[5]</sup>                 | 357 | 100 | 657 / 657   | 3 | 99.7  | 657 / 657   | 2 | 100 | 657 / 657   |
| <i>sul3</i> <sup>[6]</sup>                  | 298 | 100 | 792 / 792   | 3 | 99.87 | 792 / 792   | 2 | 100 | 792 / 792   |
| <i>tet(A)</i> <sup>[7]</sup>                | 1   | 100 | 1200 / 1200 | 3 | 99.58 | 1200 / 1200 | 2 | 100 | 1200 / 1200 |
| <i>tet(B)</i> <sup>[7]</sup>                | 269 | 100 | 1206 / 1206 | 1 | 99.83 | 1206 / 1206 | 1 | 100 | 1206 / 1206 |
| <i>dfrA12</i> <sup>[8]</sup>                | 290 | 100 | 498 / 498   | 3 | 99.8  | 498 / 498   | 2 | 100 | 498 / 498   |

[1] Aminoglycoside, [2] Beta-lactam, [3] Colistin, [4] Macrolide, [5] Quinolone, [6] Sulphonamide, [7] Tetracycline, [8] Trimethoprim

**Table S8.** Antimicrobial resistance genes detected with ResFinder in MiSeq, MinION and hybrid assembly of isolate S15BD05371 extracted with a phenol chloroform plasmid extraction.

| Resistance gene                             | MiSeq  |          |                         | MinION |          |                         | Hybrid |          |                         |
|---------------------------------------------|--------|----------|-------------------------|--------|----------|-------------------------|--------|----------|-------------------------|
|                                             | Contig | Identity | Query / Template length | Contig | Identity | Query / Template length | Contig | Identity | Query / Template length |
| <i>aac(3)-IV</i> <sup>[1]</sup>             | 1      | 100      | 777 / 777               | 2      | 99.85    | 667 / 777               | 5      | 100      | 777 / 777               |
| <i>aac(6')-Iaa</i> <sup>[1]</sup>           | 292    | 100      | 438 / 438               | -      | -        | -                       | 20     | 100      | 438 / 438               |
| <i>aadA2b</i> <sup>[1]</sup>                | 321    | 99.87    | 780 / 780               | 2      | 99.87    | 780 / 780               | 5      | 99.87    | 780 / 780               |
| <i>aph(4)-Ia</i> <sup>[1]</sup>             | 1      | 100      | 1026 / 1026             | 2      | 100      | 1026 / 1026             | 5      | 100      | 1026 / 1026             |
| <i>bla</i> <sub>TEM-1B</sub> <sup>[2]</sup> | 1      | 100      | 861 / 861               | 2      | 99.77    | 863 / 861               | 5      | 100      | 861 / 861               |
| <i>mcr-1.1</i> <sup>[3]</sup>               | 1      | 100      | 1626 / 1626             | 9      | 99.88    | 1626 / 1626             | 5      | 100      | 1626 / 1626             |
| <i>mcr-1.1</i> <sup>[3]</sup>               | -      | -        | -                       | 10     | 99.73    | 1102 / 1626             | -      | -        | -                       |
| <i>lnu(F)</i> <sup>[4]</sup>                | 321    | 100      | 761 / 822               | 2      | 99.47    | 749 / 822               | 5      | 100      | 761 / 822               |
| <i>qnrS1</i> <sup>[5]</sup>                 | 396    | 100      | 657 / 657               | -      | -        | -                       | 5      | 100      | 657 / 657               |
| <i>sul3</i> <sup>[6]</sup>                  | 1      | 100      | 792 / 792               | 8      | 99.87    | 792 / 792               | 5      | 100      | 792 / 792               |

|                   |     |     |             |   |       |             |    |     |             |
|-------------------|-----|-----|-------------|---|-------|-------------|----|-----|-------------|
| <i>tet(A)</i> [7] | 1   | 100 | 1200 / 1200 | 2 | 99.75 | 1200 / 1200 | 5  | 100 | 1200 / 1200 |
| <i>tet(B)</i> [7] | 156 | 100 | 1206 / 1206 | - | -     | -           | 47 | 100 | 1206 / 1206 |
| <i>dfrA12</i> [8] | 321 | 100 | 498 / 498   | 2 | 99.8  | 498 / 498   | 5  | 100 | 498 / 498   |

[1] Aminoglycoside, [2] Beta-lactam, [3] Colistin, [4] Macrolide, [5] Quinolone, [6] Sulphonamide, [7] Tetracycline, [8] Trimethoprim

**Table S9.** Antimicrobial resistance genes detected with ResFinder in MiSeq, MinION and hybrid assembly of isolate S15BD05371 extracted with phenol chloroform plasmid extraction followed up by an exonuclease digestion and amplification.

| Resistance gene                 | MiSeq  |          |                         | MinION |          |                         | Hybrid |          |                         |
|---------------------------------|--------|----------|-------------------------|--------|----------|-------------------------|--------|----------|-------------------------|
|                                 | Contig | Identity | Query / Template length | Contig | Identity | Query / Template length | Contig | Identity | Query / Template length |
| <i>aac(3)-IV</i> [1]            | 1      | 100      | 777 / 777               | -      | -        | -                       | 1      | 100      | 777 / 777               |
| <i>aadA2b</i> [1]               | 2      | 99.87    | 780 / 780               | -      | -        | -                       | 1      | 99.87    | 780 / 780               |
| <i>aph(4)-Ia</i> [1]            | 1      | 100      | 1026 / 1026             | -      | -        | -                       | 1      | 100      | 1026 / 1026             |
| <i>bla<sub>TEM-1B</sub></i> [2] | 1      | 100      | 861 / 861               | -      | -        | -                       | 1      | 100      | 861 / 861               |
| <i>mcr-1.1</i> [3]              | 1      | 100      | 1626 / 1626             | -      | -        | -                       | 1      | 100      | 1626 / 1626             |
| <i>lnu(F)</i> [4]               | 2      | 100      | 761 / 822               | -      | -        | -                       | 1      | 100      | 761 / 822               |
| <i>qnrS1</i> [5]                | 3      | 100      | 657 / 657               | -      | -        | -                       | 2      | 100      | 657 / 657               |
| <i>sul3</i> [6]                 | 1      | 100      | 792 / 792               | -      | -        | -                       | 1      | 100      | 792 / 792               |
| <i>tet(A)</i> [7]               | 1      | 100      | 1200 / 1200             | -      | -        | -                       | 1      | 100      | 1200 / 1200             |
| <i>dfrA12</i> [8]               | 2      | 100      | 498 / 498               | -      | -        | -                       | 1      | 100      | 498 / 498               |

[1] Aminoglycoside, [2] Beta-lactam, [3] Colistin, [4] Macrolide, [5] Quinolone, [6] Sulphonamide, [7] Tetracycline, [8] Trimethoprim

**Table S10.** Antimicrobial resistance genes detected with ResFinder in the Nanopore only and hybrid assembly of isolate COL20160015 from Flongle run 1.

| Resistance gene                  | Nanopore only |          |                         | Hybrid |          |                         |
|----------------------------------|---------------|----------|-------------------------|--------|----------|-------------------------|
|                                  | Contig        | Identity | Query / Template length | Contig | Identity | Query / Template length |
| <i>aac(3)-IIa</i> [1]            | 3             | 99.54    | 861 / 861               | 2      | 100      | 861 / 861               |
| <i>aac(3)-IID</i> [1]            | 5             | 98.84    | 865 / 861               | 4      | 99.88    | 861 / 861               |
| <i>aac(6')-Ib-cr</i> [1]         | 5             | 99.61    | 519 / 519               | 4      | 100      | 519 / 519               |
| <i>aadA1</i> [1]                 | 3             | 99.87    | 792 / 792               | 2      | 100      | 792 / 792               |
| <i>aadA2b</i> [1]                | 3             | 99.62    | 780 / 780               | 2      | 99.87    | 780 / 780               |
| <i>aadA5</i> [1]                 | 4             | 99.62    | 789 / 789               | 3      | 100      | 789 / 789               |
| <i>aph(3'')-Ib</i> [1]           | 5             | 99.5     | 806 / 804               | 4      | 99.88    | 804 / 804               |
| <i>aph(3'')-Ib</i> [1]           | 3             | 99.75    | 805 / 804               | 2      | 100      | 804 / 804               |
| <i>aph(3')-Ia</i> [1]            | 3             | 99.27    | 817 / 816               | 2      | 99.88    | 816 / 816               |
| <i>aph(6)-Id</i> [1]             | 3             | 99.4     | 838 / 837               | 2      | 100      | 837 / 837               |
| <i>aph(6)-Id</i> [1]             | 5             | 99.4     | 837 / 837               | 4      | 100      | 837 / 837               |
| <i>bla<sub>KPC-2</sub></i> [2]   | 5             | 99.32    | 883 / 882               | 4      | 100      | 882 / 882               |
| <i>bla<sub>OXA-1</sub></i> [2]   | 5             | 99.76    | 831 / 831               | 4      | 100      | 831 / 831               |
| <i>bla<sub>TEM-1A</sub></i> [2]  | 3             | 99.54    | 863 / 861               | 2      | 99.77    | 861 / 861               |
| <i>bla<sub>TEM-1B</sub></i> [2]  | 5             | 99.65    | 862 / 861               | 4      | 100      | 861 / 861               |
| <i>bla<sub>TEM-156</sub></i> [2] | 3             | 99.54    | 863 / 861               | -      | -        | -                       |
| <i>mcr-1.1</i> [3]               | 3             | 99.82    | 1626 / 1626             | 2      | 100      | 1626 / 1626             |
| <i>mdf(A)</i> [4]                | 1             | 97.88    | 1228 / 1233             | 1      | 98.22    | 1233 / 1233             |
| <i>mph(A)</i> [4]                | 4             | 99.34    | 908 / 906               | 4      | 100      | 906 / 906               |
| <i>mph(A)</i> [4]                | 5             | 99.89    | 906 / 906               | 3      | 100      | 906 / 906               |
| <i>catA1</i> [5]                 | 4             | 99.09    | 660 / 660               | 3      | 99.85    | 660 / 660               |
| <i>catB3</i> [5]                 | 5             | 99.84    | 633 / 633               | 4      | 100      | 633 / 633               |
| <i>cmlA1</i> [5]                 | 3             | 99.6     | 1260 / 1260             | 2      | 99.92    | 1260 / 1260             |
| <i>aac(6')-Ib-cr</i> [6]         | 5             | 99.61    | 519 / 519               | 4      | 100      | 519 / 519               |
| <i>qnrB2</i> [6]                 | 5             | 99.07    | 646 / 645               | 4      | 100      | 645 / 645               |
| <i>ARR-3</i> [7]                 | 5             | 99.78    | 453 / 453               | 4      | 100      | 453 / 453               |
| <i>sul1</i> [8]                  | 5             | 99.52    | 829 / 828               | 4      | 100      | 840 / 840               |
| <i>sul1</i> [8]                  | 5             | 99.64    | 840 / 840               | 3      | 100      | 840 / 840               |
| <i>sul1</i> [8]                  | 4             | 99.76    | 840 / 840               | 4      | 100      | 840 / 840               |
| <i>sul3</i> [8]                  | 3             | 99.5     | 794 / 792               | 2      | 100      | 792 / 792               |
| <i>tet(A)</i> [9]                | 3             | 99.25    | 1201 / 1200             | 2      | 100      | 1200 / 1200             |
| <i>dfrA17</i> [10]               | 4             | 99.58    | 474 / 474               | 3      | 100      | 474 / 474               |
| <i>dfrA19</i> [10]               | 5             | 99.82    | 571 / 570               | 4      | 100      | 570 / 570               |

[1] Aminoglycoside, [2] Beta-lactam, [3] Colistin, [4] Macrolide, [5] Phenicol, [6] Quinolone, [7] Rifampicin, [8] Sulphonamide, [9] Tetracycline, [10] Trimethoprim

**Table S11.** Antimicrobial resistance genes detected with ResFinder in the Nanopore only and hybrid assembly of isolate COL20160015 from Flongle run 2.

| Resistance gene                  | Nanopore only |          |                         | Hybrid |          |                         |
|----------------------------------|---------------|----------|-------------------------|--------|----------|-------------------------|
|                                  | Contig        | Identity | Query / Template length | Contig | Identity | Query / Template length |
| <i>aac(3)-IIa</i> [1]            | 2             | 99.54    | 861 / 861               | 2      | 100      | 861 / 861               |
| <i>aac(3)-IIa</i> [1]            | 4             | 99.54    | 861 / 861               | 4      | 99.88    | 861 / 861               |
| <i>aac(6')-Ib-cr</i> [1]         | 4             | 99.61    | 519 / 519               | 4      | 100      | 519 / 519               |
| <i>aadA1</i> [1]                 | 2             | 99.5     | 793 / 792               | 2      | 100      | 792 / 792               |
| <i>aadA2b</i> [1]                | 2             | 99.74    | 780 / 780               | 2      | 99.87    | 780 / 780               |
| <i>aadA5</i> [1]                 | 3             | 99.62    | 789 / 789               | 3      | 100      | 789 / 789               |
| <i>aph(3'')-Ib</i> [1]           | 4             | 99.61    | 509 / 804               | 4      | 99.88    | 804 / 804               |
| <i>aph(3'')-Ib</i> [1]           | 2             | 99.5     | 804 / 804               | 2      | 100      | 804 / 804               |
| <i>aph(3')-Ia</i> [1]            | 2             | 99.39    | 816 / 816               | 2      | 99.88    | 816 / 816               |
| <i>aph(6)-Id</i> [1]             | 2             | 99.64    | 838 / 837               | 4      | 100      | 837 / 837               |
| <i>aph(6)-Id</i> [1]             | 4             | 99.64    | 837 / 837               | 2      | 100      | 837 / 837               |
| <i>bla<sub>KPC-2</sub></i> [2]   | 4             | 99.89    | 882 / 882               | 4      | 100      | 882 / 882               |
| <i>bla<sub>OXA-1</sub></i> [2]   | 4             | 99.64    | 832 / 831               | 4      | 100      | 831 / 831               |
| <i>bla<sub>TEM-1A</sub></i> [2]  | 2             | 99.65    | 861 / 861               | 2      | 99.77    | 861 / 861               |
| <i>bla<sub>TEM-1B</sub></i> [2]  | 4             | 99.77    | 861 / 861               | 4      | 100      | 861 / 861               |
| <i>bla<sub>TEM-156</sub></i> [2] | 2             | 99.65    | 861 / 861               | -      | -        | -                       |
| <i>mcr-1.1</i> [3]               | 2             | 99.82    | 1626 / 1626             | 2      | 100      | 1626 / 1626             |
| <i>mdf(A)</i> [4]                | 1             | 97.57    | 1233 / 1233             | 1      | 98.22    | 1233 / 1233             |
| <i>mph(A)</i> [4]                | 4             | 99.67    | 906 / 906               | 3      | 100      | 906 / 906               |
| <i>mph(A)</i> [4]                | 3             | 99.89    | 906 / 906               | 4      | 100      | 906 / 906               |
| <i>catA1</i> [5]                 | 3             | 98.94    | 661 / 660               | 3      | 99.85    | 660 / 660               |
| <i>catB3</i> [5]                 | 4             | 99.37    | 633 / 633               | 4      | 100      | 633 / 633               |
| <i>cmlA1</i> [5]                 | 2             | 99.6     | 1260 / 1260             | 2      | 99.92    | 1260 / 1260             |
| <i>aac(6')-Ib-cr</i> [6]         | 4             | 99.61    | 519 / 519               | 4      | 100      | 519 / 519               |
| <i>qnrB2</i> [6]                 | 4             | 99.07    | 645 / 645               | 4      | 100      | 645 / 645               |
| <i>ARR-3</i> [7]                 | 4             | 99.78    | 453 / 453               | 4      | 100      | 453 / 453               |
| <i>sul1</i> [8]                  | 4             | 99.64    | 840 / 840               | 3      | 100      | 840 / 840               |
| <i>sul1</i> [8]                  | 3             | 99.4     | 840 / 840               | 4      | 100      | 840 / 840               |
| <i>sul1</i> [8]                  | 4             | 99.29    | 840 / 840               | 4      | 100      | 840 / 840               |
| <i>sul3</i> [8]                  | 2             | 99.75    | 792 / 792               | 2      | 100      | 792 / 792               |

|                    |   |       |             |   |     |             |
|--------------------|---|-------|-------------|---|-----|-------------|
| <i>tet(A)</i> [9]  | 2 | 99.58 | 1201 / 1200 | 2 | 100 | 1200 / 1200 |
| <i>dfrA17</i> [10] | 3 | 99.79 | 474 / 474   | 3 | 100 | 474 / 474   |
| <i>dfrA19</i> [10] | 4 | 100   | 570 / 570   | 4 | 100 | 570 / 570   |

[1] Aminoglycoside, [2] Beta-lactam, [3] Colistin, [4] Macrolide, [5] Phenicol, [6] Quinolone, [7] Rifampicin, [8] Sulphonamide, [9] Tetracycline, [10] Trimethoprim.

**Table S12.** Antimicrobial resistance genes detected with ResFinder in the Nanopore only and hybrid assembly of isolate COL20160015 from Flongle run 3.

| Resistance gene                  | Nanopore only |          |                         | Hybrid |          |                         |
|----------------------------------|---------------|----------|-------------------------|--------|----------|-------------------------|
|                                  | Contig        | Identity | Query / Template length | Contig | Identity | Query / Template length |
| <i>aac(3)-IIa</i> [1]            | 2             | 98.61    | 862 / 861               | 2      | 100      | 861 / 861               |
| <i>aac(3)-IId</i> [1]            | 5             | 99.3     | 861 / 861               | 4      | 99.88    | 861 / 861               |
| <i>aac(6')-Ib-cr</i> [1]         | 5             | 99.23    | 520 / 519               | 4      | 100      | 519 / 519               |
| <i>aadA1</i> [1]                 | 2             | 99.37    | 794 / 792               | 2      | 100      | 792 / 792               |
| <i>aadA2b</i> [1]                | 2             | 98.85    | 783 / 780               | 2      | 99.87    | 780 / 780               |
| <i>aadA5</i> [1]                 | 4             | 98.73    | 790 / 789               | 3      | 100      | 789 / 789               |
| <i>aph(3'')-Ib</i> [1]           | 5             | 99.38    | 804 / 804               | 4      | 99.88    | 804 / 804               |
| <i>aph(3'')-Ib</i> [1]           | 2             | 97.64    | 805 / 804               | 2      | 100      | 804 / 804               |
| <i>aph(3')-Ia</i> [1]            | 2             | 98.9     | 816 / 816               | 2      | 99.88    | 816 / 816               |
| <i>aph(6)-Id</i> [1]             | 5             | 99.28    | 838 / 837               | 4      | 100      | 837 / 837               |
| <i>aph(6)-Id</i> [1]             | 2             | 97.5     | 840 / 837               | 2      | 100      | 837 / 837               |
| <i>bla<sub>KPC-2</sub></i> [1]   | 5             | 99.89    | 882 / 882               | 4      | 100      | 882 / 882               |
| <i>bla<sub>OXA-1</sub></i> [2]   | 5             | 99.15    | 591 / 831               | 4      | 100      | 831 / 831               |
| <i>bla<sub>TEM-1A</sub></i> [2]  | 2             | 99.08    | 868 / 861               | 2      | 99.77    | 861 / 861               |
| <i>bla<sub>TEM-1B</sub></i> [2]  | 5             | 99.88    | 861 / 861               | 4      | 100      | 861 / 861               |
| <i>bla<sub>TEM-156</sub></i> [2] | 2             | 99.08    | 868 / 861               | -      | -        | -                       |
| <i>mcr-1.1</i> [3]               | 2             | 99.51    | 1629 / 1626             | 2      | 100      | 1626 / 1626             |
| <i>mdf(A)</i> [4]                | 1             | 97.41    | 1236 / 1233             | 1      | 98.22    | 1233 / 1233             |
| <i>mph(A)</i> [4]                | 4             | 99.23    | 906 / 906               | 3      | 100      | 906 / 906               |
| <i>mph(A)</i> [4]                | 5             | 99.34    | 907 / 906               | 4      | 100      | 906 / 906               |
| <i>catA1</i> [5]                 | 4             | 98.62    | 652 / 660               | 3      | 99.85    | 660 / 660               |
| <i>catB3</i> [5]                 | 5             | 99.68    | 633 / 633               | 4      | 100      | 633 / 633               |
| <i>cmlA1</i> [5]                 | 2             | 98.26    | 1262 / 1260             | 2      | 99.92    | 1260 / 1260             |
| <i>aac(6')-Ib-cr</i> [6]         | 5             | 99.23    | 520 / 519               | 4      | 100      | 519 / 519               |
| <i>qnrB2</i> [6]                 | 5             | 98.61    | 646 / 645               | 4      | 100      | 645 / 645               |
| <i>ARR-3</i> [7]                 | 5             | 99.56    | 453 / 453               | 4      | 100      | 453 / 453               |
| <i>sul1</i> [8]                  | 4             | 98.46    | 843 / 840               | 4      | 100      | 840 / 840               |

|                    |   |       |             |   |     |             |
|--------------------|---|-------|-------------|---|-----|-------------|
| <i>sul1</i> [8]    | 5 | 99.64 | 840 / 840   | 3 | 100 | 840 / 840   |
| <i>sul1</i> [8]    | 5 | 99.4  | 840 / 840   | 4 | 100 | 840 / 840   |
| <i>sul3</i> [8]    | 2 | 97.98 | 794 / 792   | 2 | 100 | 792 / 792   |
| <i>tet(A)</i> [9]  | 2 | 98.75 | 1200 / 1200 | 2 | 100 | 1200 / 1200 |
| <i>dfrA17</i> [10] | 4 | 98.32 | 477 / 474   | 3 | 100 | 474 / 474   |
| <i>dfrA19</i> [10] | 5 | 99.65 | 570 / 570   | 4 | 100 | 570 / 570   |

[1] Aminoglycoside, [2] Beta-lactam, [3] Colistin, [4] Macrolide, [5] Phenicol, [6] Quinolone, [7] Rifampicin, [8] Sulphonamide, [9] Tetracycline, [10] Trimethoprim.

**Table S13.** Antimicrobial resistance genes detected with ResFinder in the Nanopore only and hybrid assembly of isolate COL20160015 from Flongle run 4.

| Resistance gene                 | Nanopore only |          |                         | Hybrid |          |                         |
|---------------------------------|---------------|----------|-------------------------|--------|----------|-------------------------|
|                                 | Contig        | Identity | Query / Template length | Contig | Identity | Query / Template length |
| <i>aac(3)-IIa</i> [1]           | 2             | 99.42    | 861 / 861               | 2      | 100      | 861 / 861               |
| <i>aac(3)-IIId</i> [1]          | 4             | 99.19    | 862 / 861               | 4      | 99.88    | 861 / 861               |
| <i>aac(3)-IIId</i> [1]          | 8             | 98.14    | 862 / 861               | -      | -        | -                       |
| <i>aac(6')-Ib-cr</i> [1]        | 4             | 99       | 601 / 600               | 4      | 100      | 519 / 519               |
| <i>aac(6')-Ib-cr</i> [1]        | 8             | 98       | 600 / 600               | -      | -        | -                       |
| <i>aadA1</i> [1]                | 2             | 99.5     | 795 / 792               | 2      | 100      | 792 / 792               |
| <i>aadA2b</i> [1]               | 2             | 99.36    | 780 / 780               | 2      | 99.87    | 780 / 780               |
| <i>aadA5</i> [1]                | 3             | 99.62    | 789 / 789               | 3      | 100      | 789 / 789               |
| <i>aph(3'')-Ib</i> [1]          | 7             | 98.26    | 806 / 804               | 4      | 99.88    | 804 / 804               |
| <i>aph(3'')-Ib</i> [1]          | 4             | 99.13    | 804 / 804               | 2      | 100      | 804 / 804               |
| <i>aph(3'')-Ib</i> [1]          | 8             | 98.51    | 806 / 804               | -      | -        | -                       |
| <i>aph(3'')-Ib</i> [1]          | 4             | 99.5     | 805 / 804               | -      | -        | -                       |
| <i>aph(3'')-Ib</i> [1]          | 7             | 98.26    | 806 / 804               | -      | -        | -                       |
| <i>aph(3'')-Ib</i> [1]          | 2             | 99.75    | 804 / 804               | -      | -        | -                       |
| <i>aph(3')-Ia</i> [1]           | 2             | 99.27    | 817 / 816               | 2      | 99.88    | 816 / 816               |
| <i>aph(6)-Id</i> [1]            | 4             | 99.64    | 838 / 837               | 4      | 100      | 837 / 837               |
| <i>aph(6)-Id</i> [1]            | 7             | 98.92    | 837 / 837               | 2      | 100      | 837 / 837               |
| <i>aph(6)-Id</i> [1]            | 2             | 99.4     | 837 / 837               | -      | -        | -                       |
| <i>aph(6)-Id</i> [1]            | 8             | 99.04    | 837 / 837               | -      | -        | -                       |
| <i>aph(6)-Id</i> [1]            | 4             | 99.05    | 838 / 837               | -      | -        | -                       |
| <i>bla<sub>KPC-2</sub></i> [2]  | 4             | 99.66    | 882 / 882               | 4      | 100      | 882 / 882               |
| <i>bla<sub>OXA-1</sub></i> [2]  | 8             | 98.32    | 831 / 831               | 4      | 100      | 831 / 831               |
| <i>bla<sub>OXA-1</sub></i> [2]  | 4             | 99.52    | 832 / 831               | -      | -        | -                       |
| <i>bla<sub>TEM-1A</sub></i> [2] | 2             | 99.77    | 862 / 861               | 2      | 99.77    | 861 / 861               |

|                                   |   |       |             |   |       |             |
|-----------------------------------|---|-------|-------------|---|-------|-------------|
| <i>bla</i> <sub>TEM-1B</sub> [2]  | 4 | 99.42 | 865 / 861   | 2 | 99.88 | 861 / 861   |
| <i>bla</i> <sub>TEM-156</sub> [2] | 2 | 99.77 | 862 / 861   | - | -     | -           |
| <i>mcr-1.1</i> [3]                | 2 | 99.94 | 1626 / 1626 | 2 | 100   | 1626 / 1626 |
| <i>mdf(A)</i> [4]                 | 1 | 97.73 | 1233 / 1233 | 1 | 98.22 | 1233 / 1233 |
| <i>mph(A)</i> [4]                 | 4 | 99.56 | 906 / 906   | 3 | 100   | 906 / 906   |
| <i>mph(A)</i> [4]                 | 7 | 99.67 | 906 / 906   | 4 | 100   | 906 / 906   |
| <i>mph(A)</i> [4]                 | 3 | 99.45 | 906 / 906   | - | -     | -           |
| <i>mph(A)</i> [4]                 | 8 | 99.34 | 906 / 906   | - | -     | -           |
| <i>mph(A)</i> [4]                 | 4 | 98.02 | 907 / 906   | - | -     | -           |
| <i>catA1</i> [5]                  | 3 | 99.39 | 661 / 660   | 3 | 99.85 | 660 / 660   |
| <i>catA1</i> [5]                  | 7 | 98.03 | 661 / 660   | - | -     | -           |
| <i>catB3</i> [5]                  | 8 | 99.05 | 633 / 633   | 4 | 100   | 633 / 633   |
| <i>catB3</i> [5]                  | 4 | 99.68 | 633 / 633   | - | -     | -           |
| <i>cmlA1</i> [5]                  | 2 | 99.76 | 1260 / 1260 | 2 | 99.92 | 1260 / 1260 |
| <i>aac(6')-Ib-cr</i> [6]          | 8 | 98    | 600 / 600   | 4 | 100   | 519 / 519   |
| <i>aac(6')-Ib-cr</i> [6]          | 4 | 99    | 601 / 600   | - | -     | -           |
| <i>qnrB2</i> [6]                  | 8 | 97.67 | 645 / 645   | 4 | 100   | 645 / 645   |
| <i>qnrB2</i> [6]                  | 7 | 98.29 | 645 / 645   | - | -     | -           |
| <i>qnrB2</i> [6]                  | 4 | 98.15 | 647 / 645   | - | -     | -           |
| <i>qnrB2</i> [6]                  | 4 | 98.45 | 647 / 645   | - | -     | -           |
| <i>ARR-3</i> [7]                  | 4 | 99.56 | 453 / 453   | 4 | 100   | 453 / 453   |
| <i>ARR-3</i> [7]                  | 8 | 98.9  | 453 / 453   | - | -     | -           |
| <i>sul1</i> [8]                   | 4 | 99.17 | 841 / 840   | 4 | 100   | 840 / 840   |
| <i>sul1</i> [8]                   | 3 | 99.52 | 840 / 840   | 3 | 100   | 840 / 840   |
| <i>sul1</i> [8]                   | 4 | 98.7  | 843 / 840   | 4 | 100   | 840 / 840   |
| <i>sul1</i> [8]                   | 4 | 99.64 | 840 / 840   | - | -     | -           |
| <i>sul1</i> [8]                   | 8 | 98.57 | 840 / 840   | - | -     | -           |
| <i>sul1</i> [8]                   | 7 | 98.57 | 841 / 840   | - | -     | -           |
| <i>sul1</i> [8]                   | 8 | 98.81 | 841 / 840   | - | -     | -           |
| <i>sul3</i> [8]                   | 2 | 99.5  | 793 / 792   | 2 | 100   | 792 / 792   |
| <i>tet(A)</i> [9]                 | 2 | 99.58 | 1201 / 1200 | 2 | 100   | 1200 / 1200 |
| <i>dfrA17</i> [10]                | 3 | 99.79 | 474 / 474   | 3 | 100   | 474 / 474   |
| <i>dfrA18</i> [10]                | 8 | 99.12 | 570 / 570   | - | -     | -           |
| <i>dfrA19</i> [10]                | 7 | 99.3  | 572 / 570   | 4 | 100   | 570 / 570   |
| <i>dfrA19</i> [10]                | 8 | 99.12 | 570 / 570   | - | -     | -           |
| <i>dfrA19</i> [10]                | 4 | 99.13 | 573 / 570   | - | -     | -           |



|                               |   |       |           |   |   |   |
|-------------------------------|---|-------|-----------|---|---|---|
| <i>dfrA19</i> <sup>[10]</sup> | 4 | 99.48 | 572 / 570 | - | - | - |
|-------------------------------|---|-------|-----------|---|---|---|

[1] Aminoglycoside, [2] Beta-lactam, [3] Colistin, [4] Macrolide, [5] Phenicol, [6] Quinolone, [7] Rifampicin, [8] Sulphonamide, [9] Tetracycline, [10] Trimethoprim

**Table S14.** Antimicrobial resistance genes detected with ResFinder in the Nanopore only and hybrid assembly of isolate S15BD05371 from Flongle run 5.

| Resistance gene                            | Nanopore only |          |                         | Hybrid |          |                         |
|--------------------------------------------|---------------|----------|-------------------------|--------|----------|-------------------------|
|                                            | Contig        | Identity | Query / Template length | Contig | Identity | Query / Template length |
| <i>aac(3)-IV</i> <sup>[1]</sup>            | 2             | 99.61    | 777 / 777               | 2      | 100      | 777 / 777               |
| <i>aac(6')-Iaa</i> <sup>[1]</sup>          | 1             | 100      | 438 / 438               | 1      | 100      | 438 / 438               |
| <i>aadA2b</i> <sup>[1]</sup>               | 2             | 99.49    | 780 / 780               | 2      | 99.87    | 780 / 780               |
| <i>aph(4)-Ia</i> <sup>[1]</sup>            | 2             | 100      | 1026 / 1026             | 2      | 100      | 1026 / 1026             |
| <i>bla<sub>TEM-1B</sub></i> <sup>[2]</sup> | 2             | 99.88    | 861 / 861               | 2      | 100      | 861 / 861               |
| <i>mcr-1.1</i> <sup>[3]</sup>              | 2             | 99.75    | 1627 / 1626             | 2      | 100      | 1626 / 1626             |
| <i>lnu(F)</i> <sup>[4]</sup>               | 2             | 99.74    | 761 / 822               | 2      | 100      | 761 / 822               |
| <i>qnrS1</i> <sup>[5]</sup>                | 2             | 99.7     | 657 / 657               | 2      | 100      | 657 / 657               |
| <i>sul3</i> <sup>[6]</sup>                 | 2             | 99.62    | 795 / 792               | 2      | 100      | 792 / 792               |
| <i>tet(A)</i> <sup>[7]</sup>               | 2             | 99.33    | 1202 / 1200             | 2      | 100      | 1200 / 1200             |
| <i>tet(B)</i> <sup>[7]</sup>               | 1             | 99.67    | 1208 / 1206             | 1      | 100      | 1206 / 1206             |
| <i>dfrA12</i> <sup>[8]</sup>               | 2             | 99.8     | 498 / 498               | 2      | 100      | 498 / 498               |

[1] Aminoglycoside, [2] Beta-lactam, [3] Colistin, [4] Macrolide, [5] Quinolone, [6] Sulphonamide, [7] Tetracycline, [8] Trimethoprim

**Table S15.** Statistics of all sequencing reads that were used in assemblies of this study.

| isolate     | species               | extraction method | sequencing technology | library preparation                          | used in following assemblies           | Mean read length (bp) | Mean read quality | Median read length (bp) | Median read quality | Number of reads | Read length N50 (bp) | Total bases (bp) |
|-------------|-----------------------|-------------------|-----------------------|----------------------------------------------|----------------------------------------|-----------------------|-------------------|-------------------------|---------------------|-----------------|----------------------|------------------|
| COL20160015 | <i>E. coli</i>        | G100              | MinION                | SQK-LSK108 + EXP-NBD103 + fragmenting to 8kb | Minion and hybrid assembly COL20160015 | 7,758                 | 9.7               | 7,566                   | 10.0                | 75,322          | 10,110               | 584,335,770      |
| R274        | <i>E. coli</i>        | G100              | MinION                | SQK-LSK108 + EXP-NBD103 + fragmenting to 8kb | Minion and hybrid assembly R274        | 6,455                 | 8.7               | 6,327                   | 9.0                 | 47,812          | 7,755                | 308,620,023      |
| S15BD05371  | <i>S. Typhimurium</i> | G100              | MinION                | SQK-LSK108 + EXP-NBD103 + fragmenting to 8kb | as-6 + 11                              | 7,121                 | 8.7               | 6,874                   | 8.9                 | 95,008          | 8,503                | 676,580,030      |
| S15BD05371  | <i>S. Typhimurium</i> | MagCore           | MinION                | SQK-LSK108 + EXP-NBD103 + fragmenting to 8kb | as-7 + 12                              | 758                   | 9.5               | 398                     | 9.7                 | 772,993         | 989                  | 585,584,477      |
| S15BD05371  | <i>S. Typhimurium</i> | G500              | MinION                | SQK-LSK108 + EXP-NBD103 +                    | as-8 + 13                              | 4,946                 | 8.6               | 4,432                   | 8.8                 | 102,176         | 7,461                | 505,396,084      |

|              |                |              |        |                                              |                            |       |     |       |     |         |       |             |
|--------------|----------------|--------------|--------|----------------------------------------------|----------------------------|-------|-----|-------|-----|---------|-------|-------------|
|              |                |              |        | fragmenting to 8kb                           |                            |       |     |       |     |         |       |             |
| S15B D053 71 | S. Typhimurium | phenol       | MinION | SQK-LSK108 + EXP-NBD103 + fragmenting to 8kb | as-9 + 14                  | 842   | 8.8 | 610   | 8.9 | 112,647 | 1,107 | 94,864,356  |
| S15B D053 71 | S. Typhimurium | phenol-ampli | MinION | SQK-LSK108 + EXP-NBD103 + fragmenting to 8kb | as-10 + 15                 | 641   | 8.8 | 485   | 8.9 | 27,407  | 753   | 17,557,112  |
| S16B D087 30 | S. Kentucky    | MagCore      | MinION | SQK-LSK108 + EXP-NBD103 + fragmenting to 8kb | S16BD08730 hybrid assembly | 1,745 | 9.6 | 1,002 | 9.8 | 305,790 | 3,006 | 533,726,048 |
| S18B D006 84 | S. Kentucky    | MagCore      | MinION | SQK-LSK108 + EXP-NBD103 + fragmenting to 8kb | S18BD00684 hybrid assembly | 1,412 | 9.5 | 784   | 9.8 | 446,895 | 2,277 | 630,811,894 |
| S18B D039 94 | S. Kentucky    | MagCore      | MinION | SQK-LSK108 + EXP-NBD103 + fragmenting to 8kb | S18BD03994 hybrid assembly | 1,372 | 9.5 | 795   | 9.7 | 287,591 | 2,208 | 394,584,825 |

|                     |                                  |             |         |                                                                |                                                       |       |      |       |      |         |        |                   |
|---------------------|----------------------------------|-------------|---------|----------------------------------------------------------------|-------------------------------------------------------|-------|------|-------|------|---------|--------|-------------------|
| S18B<br>D050<br>11  | <i>S.</i><br>Kentuc<br>ky        | MagCor<br>e | MinION  | SQK-<br>LSK108 +<br>EXP-<br>NBD103 +<br>fragmentin<br>g to 8kb | S18BD05011<br>hybrid<br>assembly                      | 1,144 | 9.5  | 707   | 9.8  | 722,425 | 1,709  | 826,063<br>,474   |
| COL2<br>01600<br>15 | <i>E. coli</i>                   | G100        | Flongle | SQK-<br>LSK109 +<br>fragmentin<br>g to 8kb                     | Flongle 1<br>hybrid +<br>Nanopore<br>only<br>assembly | 7,368 | 7.5  | 7,118 | 7.8  | 117,788 | 11,059 | 867,857<br>,659   |
| COL2<br>01600<br>15 | <i>E. coli</i>                   | G100        | Flongle | SQK-<br>LSK109                                                 | Flongle 2<br>hybrid +<br>Nanopore<br>only<br>assembly | 6,459 | 7.4  | 1,757 | 7.7  | 107,610 | 21,861 | 695,075<br>,675   |
| COL2<br>01600<br>15 | <i>E. coli</i>                   | G100        | Flongle | SQK-<br>LSK109<br>(LFB used)                                   | Flongle 3<br>hybrid +<br>Nanopore<br>only<br>assembly | 4,334 | 6.2  | 1,343 | 6.2  | 114,758 | 14,190 | 497,339<br>,098   |
| COL2<br>01600<br>15 | <i>E. coli</i>                   | MagCor<br>e | Flongle | SQK-<br>LSK109                                                 | Flongle 4<br>hybrid +<br>Nanopore<br>only<br>assembly | 7,189 | 7.2  | 3,483 | 7.6  | 100,353 | 15,787 | 721,405<br>,028   |
| S15B<br>D053<br>71  | <i>S.</i><br>Typhi<br>muriu<br>m | MagCor<br>e | Flongle | SQK-<br>LSK109                                                 | Flongle 5<br>hybrid +<br>Nanopore<br>only<br>assembly | 7,200 | 7.8  | 4,202 | 8.0  | 182,252 | 13,950 | 1,312,1<br>54,207 |
| COL2<br>01600<br>15 | <i>E. coli</i>                   | G100        | MiSeq   | paired-end<br>(forward<br>reads)                               | MiSeq and<br>hybrid<br>assembly                       | 219   | 34.4 | 250   | 37.2 | 709,981 | 250    | 155,613<br>,734   |

|                     |                           |             |       |                                  |                                                                                         |     |      |     |      |         |     |                 |
|---------------------|---------------------------|-------------|-------|----------------------------------|-----------------------------------------------------------------------------------------|-----|------|-----|------|---------|-----|-----------------|
|                     |                           |             |       |                                  | COL2016001<br>5 + Flongle 1-<br>3 hybrid<br>assembly                                    |     |      |     |      |         |     |                 |
| COL2<br>01600<br>15 | E. coli                   | G100        | MiSeq | paired-end<br>(reverse<br>reads) | MiSeq and<br>hybrid<br>assembly<br>COL2016001<br>5 + Flongle 1-<br>3 hybrid<br>assembly | 219 | 32.3 | 250 | 35.9 | 709,981 | 250 | 155,608<br>,764 |
| R274                | E. coli                   | G100        | MiSeq | paired-end<br>(forward<br>reads) | MiSeq and<br>hybrid<br>assembly<br>R274                                                 | 249 | 31.7 | 251 | 33.4 | 315,054 | 251 | 78,281,<br>659  |
| R274                | E. coli                   | G100        | MiSeq | paired-end<br>(reverse<br>reads) | MiSeq and<br>hybrid<br>assembly<br>R274                                                 | 249 | 22   | 251 | 21.5 | 315,054 | 251 | 78,275,<br>491  |
| S15B<br>D053<br>71  | S.<br>Typhi<br>muriu<br>m | G100        | MiSeq | paired-end<br>(forward<br>reads) | as-1 + 11                                                                               | 248 | 32.4 | 251 | 35.3 | 369,346 | 251 | 91,472,<br>184  |
| S15B<br>D053<br>71  | S.<br>Typhi<br>muriu<br>m | G100        | MiSeq | paired-end<br>(reverse<br>reads) | as-1 + 11                                                                               | 248 | 22.9 | 251 | 22.4 | 369,346 | 251 | 91,473,<br>638  |
| S15B<br>D053<br>71  | S.<br>Typhi<br>muriu<br>m | MagCor<br>e | MiSeq | paired-end<br>(forward<br>reads) | as-2 + 12                                                                               | 228 | 33.9 | 250 | 36.9 | 790,045 | 250 | 180,418<br>,288 |
| S15B<br>D053<br>71  | S.<br>Typhi               | MagCor<br>e | MiSeq | paired-end<br>(reverse<br>reads) | as-2+ 12                                                                                | 228 | 31   | 250 | 33   | 790,045 | 250 | 180,454<br>,329 |

|                    |                           |                  |       |                                  |                                  |     |      |     |      |         |     |                 |
|--------------------|---------------------------|------------------|-------|----------------------------------|----------------------------------|-----|------|-----|------|---------|-----|-----------------|
|                    | muriu<br>m                |                  |       |                                  |                                  |     |      |     |      |         |     |                 |
| S15B<br>D053<br>71 | S.<br>Typhi<br>muriu<br>m | G500             | MiSeq | paired-end<br>(forward<br>reads) | as-3 + 13                        | 247 | 32.7 | 251 | 35.7 | 137,178 | 251 | 33,832,<br>661  |
| S15B<br>D053<br>71 | S.<br>Typhi<br>muriu<br>m | G500             | MiSeq | paired-end<br>(reverse<br>reads) | as-3 + 13                        | 247 | 24.2 | 251 | 23.9 | 137,178 | 251 | 33,834,<br>062  |
| S15B<br>D053<br>71 | S.<br>Typhi<br>muriu<br>m | phenol           | MiSeq | paired-end<br>(forward<br>reads) | as-4 + 14                        | 242 | 33.7 | 251 | 36.6 | 334,020 | 251 | 80,947,<br>612  |
| S15B<br>D053<br>71 | S.<br>Typhi<br>muriu<br>m | phenol           | MiSeq | paired-end<br>(reverse<br>reads) | as-4 + 14                        | 242 | 25.5 | 251 | 25.1 | 334,020 | 251 | 80,980,<br>749  |
| S15B<br>D053<br>71 | S.<br>Typhi<br>muriu<br>m | phenol-<br>ampli | MiSeq | paired-end<br>(forward<br>reads) | as-5 + 15                        | 181 | 34.4 | 185 | 37.3 | 242,862 | 224 | 43,879,<br>388  |
| S15B<br>D053<br>71 | S.<br>Typhi<br>muriu<br>m | phenol-<br>ampli | MiSeq | paired-end<br>(reverse<br>reads) | as-5 + 15                        | 181 | 31.2 | 185 | 34.5 | 242,862 | 226 | 43,973,<br>597  |
| S16B<br>D087<br>30 | S.<br>Kentuc<br>ky        | MagCor<br>e      | MiSeq | paired-end<br>(forward<br>reads) | S16BD08730<br>hybrid<br>assembly | 199 | 33.4 | 235 | 36.7 | 607,628 | 250 | 120,841<br>,302 |
| S16B<br>D087<br>30 | S.<br>Kentuc<br>ky        | MagCor<br>e      | MiSeq | paired-end<br>(reverse<br>reads) | S16BD08730<br>hybrid<br>assembly | 199 | 31.6 | 236 | 34.5 | 607,628 | 250 | 120,940<br>,255 |

|               |                |         |       |                            |                            |     |      |     |      |         |     |             |
|---------------|----------------|---------|-------|----------------------------|----------------------------|-----|------|-----|------|---------|-----|-------------|
| S18B D006 84  | S. Kentucky    | MagCore | MiSeq | paired-end (forward reads) | S18BD00684 hybrid assembly | 202 | 34.4 | 226 | 37.3 | 619,910 | 248 | 125,053,848 |
| S18B D006 84  | S. Kentucky    | MagCore | MiSeq | paired-end (reverse reads) | S18BD00684 hybrid assembly | 202 | 31.6 | 227 | 34.7 | 619,910 | 249 | 125,272,933 |
| S18B D039 94  | S. Kentucky    | MagCore | MiSeq | paired-end (forward reads) | S18BD03994 hybrid assembly | 204 | 34.2 | 231 | 37.2 | 782,750 | 249 | 159,939,692 |
| S18B D039 94  | S. Kentucky    | MagCore | MiSeq | paired-end (reverse reads) | S18BD03994 hybrid assembly | 205 | 31.7 | 233 | 34.8 | 782,750 | 250 | 160,156,721 |
| S18B D050 11  | S. Kentucky    | MagCore | MiSeq | paired-end (forward reads) | S18BD05011 hybrid assembly | 242 | 33.4 | 251 | 36.4 | 674,244 | 251 | 163,445,295 |
| S18B D050 11  | S. Kentucky    | MagCore | MiSeq | paired-end (reverse reads) | S18BD05011 hybrid assembly | 242 | 30.6 | 251 | 31.7 | 674,244 | 251 | 163,440,795 |
| COL2 01600 15 | <i>E. coli</i> | MagCore | MiSeq | paired-end (forward reads) | Flongle 4 hybrid assembly  | 210 | 33.6 | 250 | 36.8 | 548,284 | 250 | 115,156,098 |
| COL2 01600 15 | <i>E. coli</i> | MagCore | MiSeq | paired-end (reverse reads) | Flongle 4 hybrid assembly  | 210 | 31.2 | 250 | 33.8 | 548,284 | 250 | 115,235,485 |
| S15B D053 71  | S. Typhimurium | MagCore | MiSeq | paired-end (forward reads) | Flongle 5 hybrid assembly  | 193 | 34.4 | 210 | 37.4 | 646,188 | 238 | 124,955,565 |
| S15B D053 71  | S. Typhimurium | MagCore | MiSeq | paired-end (reverse reads) | Flongle 5 hybrid assembly  | 194 | 32.5 | 211 | 35.9 | 646,188 | 239 | 125,140,722 |

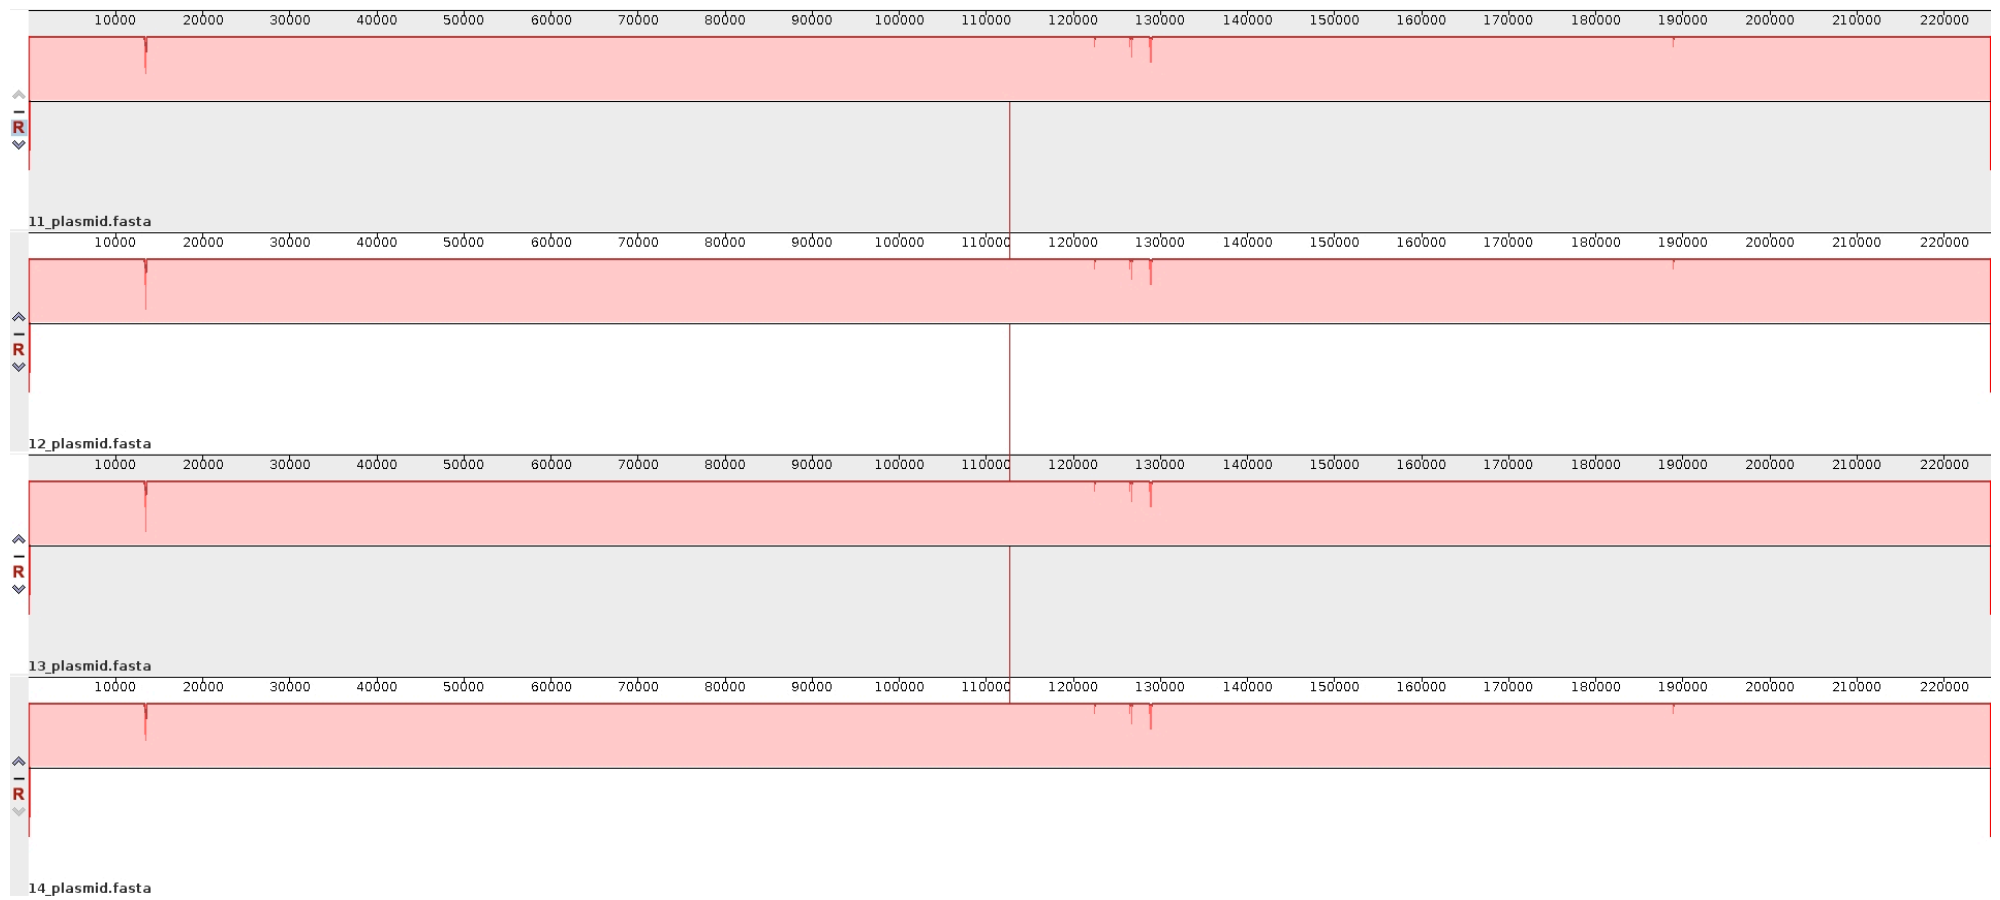

Figure S1. Mauve alignment between the reconstructed *mcr-1* plasmid of assemblies 11–14.



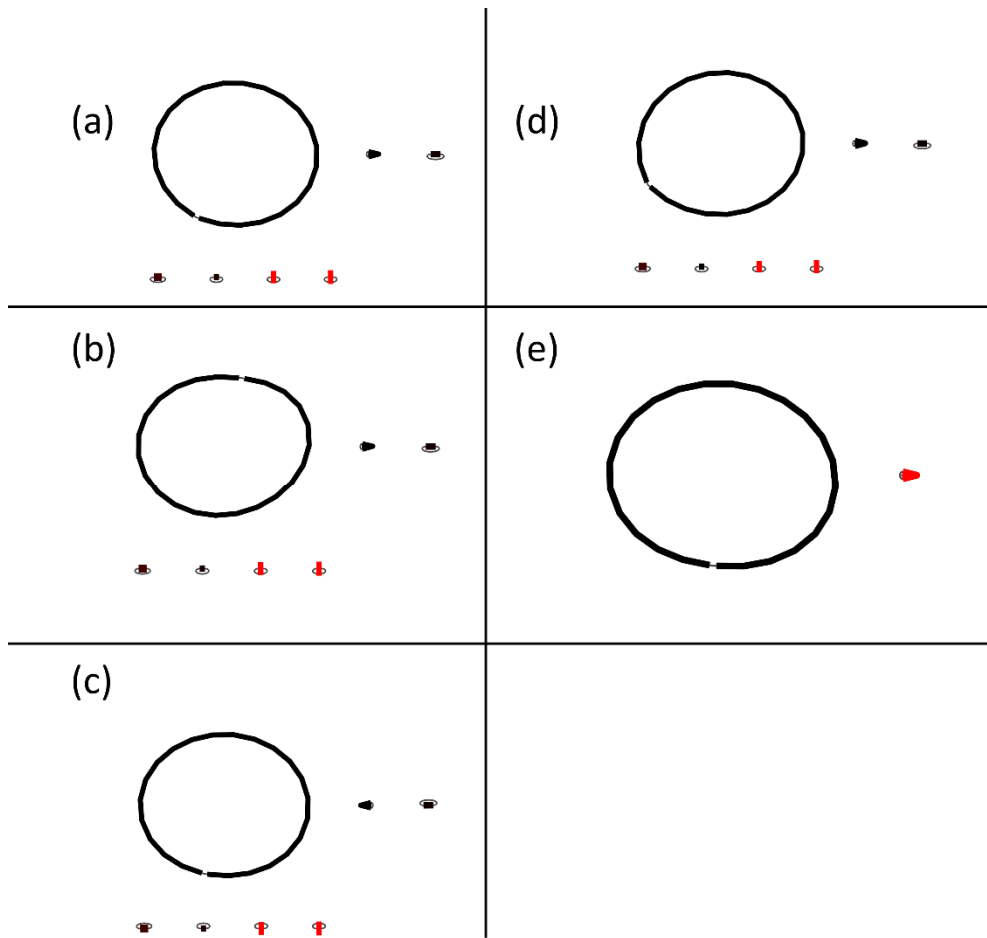

**Figure S2.** Visualization of hybrid assemblies of isolates COL20160015 and S15BD05371 from Flongle run 1 (a), 2 (b), 3 (c), 4 (d), 5 (e).

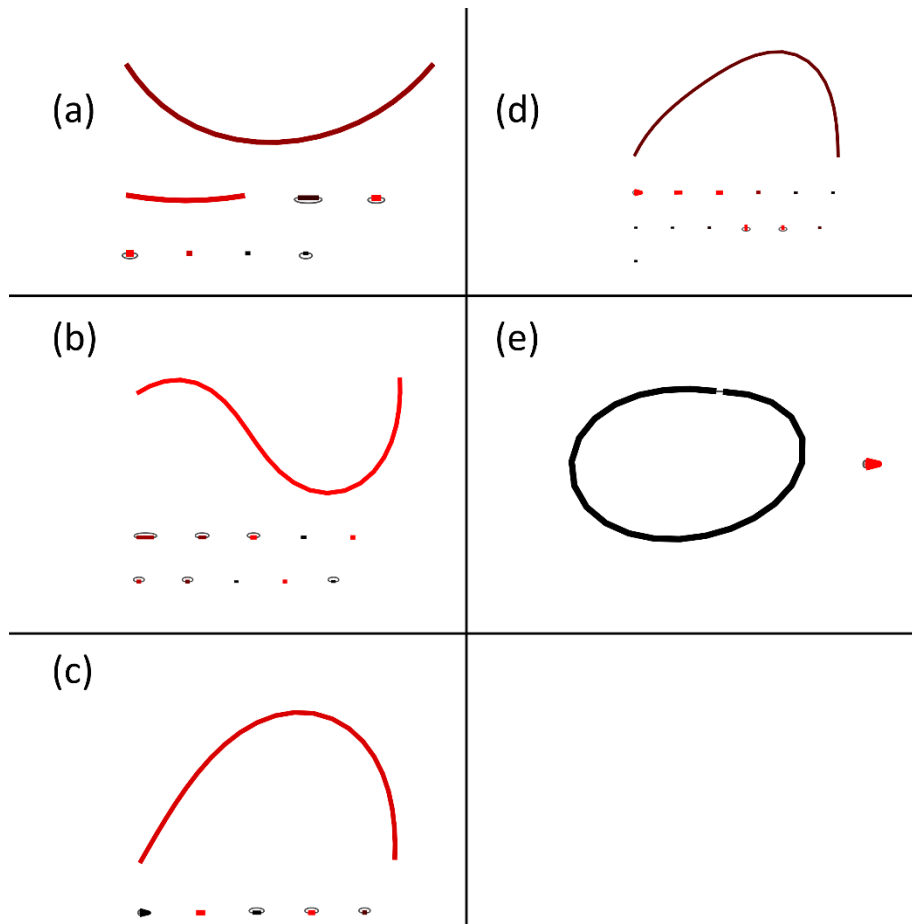

**Figure S3.** Visualization of MinION assemblies of isolates COL20160015 and S15BD05371 from Flongle run 1 (a), 2 (b), 3 (c), 4 (d), 5 (e).

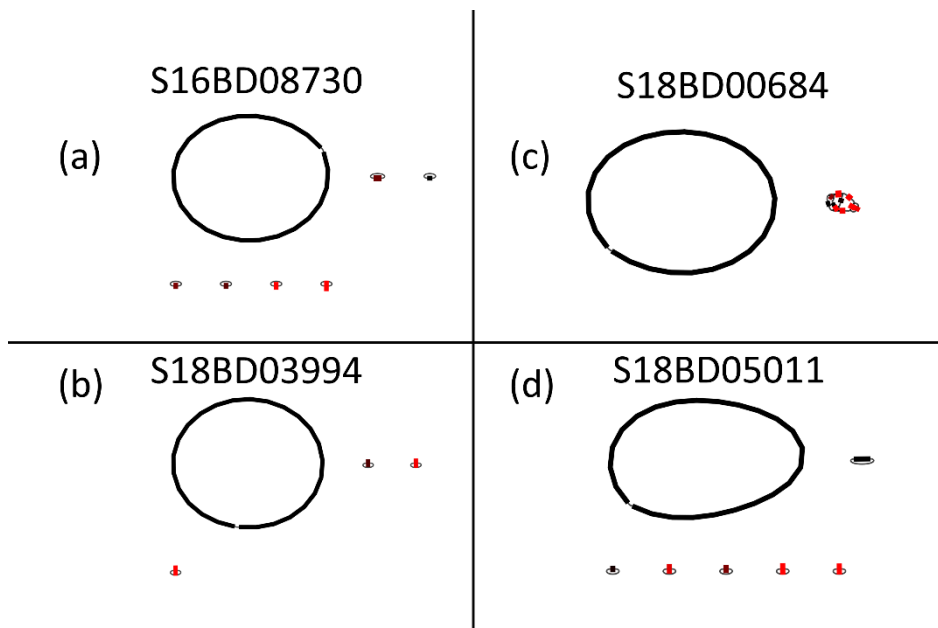

**Figure S4.** Visualization of hybrid assemblies of isolates S16BD08730 (a), S18BD03994 (b), S18BD00684 (c) and S18BD05011 (d).
